# Supplementary material
Source: PubMed Central journal article supplement (PMC6125553)
Supplement: zac009187461s1.pdf [file zac009187461s1.pdf]

Table 1: Simulated median AUC/MIC for total and unbound concentrations [90 % prediction interval]

|                 |              | IV Low dose (10 mg/kg), total concentration |                           |                  |
|-----------------|--------------|---------------------------------------------|---------------------------|------------------|
|                 |              | <i>P. aeruginosa</i>                        | <i>Enterobacteriaceae</i> | <i>S. aureus</i> |
| <b>KF = 0.5</b> | <b>0.5y</b>  | 146 [73 – 282]                              | 1213 [606 – 2347]         | 73 [36 – 141]    |
|                 | <b>1.5y</b>  | 154 [71 – 298]                              | 1285 [589 – 2480]         | 77 [35 – 149]    |
|                 | <b>2.5y</b>  | 161 [74 – 314]                              | 1344 [617 – 2728]         | 81 [37 – 164]    |
|                 | <b>6.5y</b>  | 182 [84 – 346]                              | 1517 [702 – 2880]         | 91 [42 – 173]    |
|                 | <b>12.5y</b> | 188 [87 – 420]                              | 1567 [728 – 3497]         | 94 [44 – 210]    |
| <b>KF = 1</b>   | <b>0.5y</b>  | 110 [56 – 214]                              | 915 [467 – 1783]          | 55 [28 – 107]    |
|                 | <b>1.5y</b>  | 116 [57 – 222]                              | 968 [475 – 1846]          | 58 [29 – 111]    |
|                 | <b>2.5y</b>  | 121 [59 – 238]                              | 1006 [492 – 1980]         | 60 [30 - 119]    |
|                 | <b>6.5y</b>  | 135 [70 – 264]                              | 1128 [586 – 2201]         | 68 [35 – 132]    |
|                 | <b>12.5y</b> | 144 [73 – 312]                              | 1203 [607 – 2603]         | 72 [36 – 156]    |
| <b>KF = 1.5</b> | <b>0.5y</b>  | 90 [45 – 180]                               | 750 [378 – 1500]          | 45 [23 – 90]     |
|                 | <b>1.5y</b>  | 93 [47 – 185]                               | 777 [394 – 1541]          | 47 [24 – 92]     |
|                 | <b>2.5y</b>  | 98 [49 – 194]                               | 818 [405 – 1620]          | 49 [24 – 97]     |
|                 | <b>6.5y</b>  | 111 [58 – 214]                              | 929 [483 – 1783]          | 56 [29 – 107]    |

|                 |              |                                                     |                        |                  |
|-----------------|--------------|-----------------------------------------------------|------------------------|------------------|
|                 | <b>12.5y</b> | 120 [60 – 249]                                      | 1001 [504 - 2071]      | 60 [30 – 124]    |
|                 |              | <b>IV High dose (15 mg/kg), total concentration</b> |                        |                  |
|                 |              | <i>P. aeruginosa</i>                                | <i>Enterobacteriae</i> | <i>S. aureus</i> |
| <b>KF = 0.5</b> | <b>0.5y</b>  | 216 [106 – 421]                                     | 1800 [880 – 3507]      | 108 [53 – 210]   |
|                 | <b>1.5y</b>  | 230 [105 – 456]                                     | 1913 [871 – 3798]      | 115 [52 – 228]   |
|                 | <b>2.5y</b>  | 246 [115 – 508]                                     | 2054 [955 – 4233]      | 123 [57 – 254]   |
|                 | <b>6.5y</b>  | 280 [132 – 550]                                     | 2333 [1098 – 4585]     | 140 [66 – 275]   |
|                 | <b>12.5y</b> | 305 [142 – 660]                                     | 2541 [1184 – 5503]     | 152 [71 – 330]   |
| <b>KF = 1</b>   | <b>0.5y</b>  | 166 [86 – 317]                                      | 1385 [717 – 2643]      | 83 [43 – 159]    |
|                 | <b>1.5y</b>  | 173 [86 – 333]                                      | 1443 [719 – 2779]      | 87 [43 – 167]    |
|                 | <b>2.5y</b>  | 183 [91 – 366]                                      | 1524 [756 – 3051]      | 91 [45 – 183]    |
|                 | <b>6.5y</b>  | 212 [110 – 397]                                     | 1763 [914 – 3308]      | 106 [55 – 198]   |
|                 | <b>12.5y</b> | 234 [116 – 483]                                     | 1946 [963 – 4028]      | 117 [58 – 242]   |
| <b>KF = 1.5</b> | <b>0.5y</b>  | 133 [66 – 263]                                      | 1110 [552 – 2195]      | 67 [33 – 132]    |
|                 | <b>1.5y</b>  | 140 [69 – 276]                                      | 1167 [578 – 2299]      | 70 [35 – 138]    |
|                 | <b>2.5y</b>  | 151 [75 – 310]                                      | 1254 [621 – 2583]      | 75 [37 – 155]    |
|                 | <b>6.5y</b>  | 170 [90 – 327]                                      | 1414 [746 – 2725]      | 85 [45 – 164]    |

|                 |              |                                                    |                        |                  |
|-----------------|--------------|----------------------------------------------------|------------------------|------------------|
|                 | <b>12.5y</b> | 189 [96 – 399]                                     | 1574 [803 – 3322]      | 94 [48 – 199]    |
|                 |              | <b>PO Low dose (15 mg/kg), total concentration</b> |                        |                  |
|                 |              | <i>P. aeruginosa</i>                               | <i>Enterobacteriae</i> | <i>S. aureus</i> |
| <b>KF = 0.5</b> | <b>0.5y</b>  | 119 [57 – 242]                                     | 991 [475 – 2021]       | 59 [28 – 121]    |
|                 | <b>1.5y</b>  | 129 [59 – 254]                                     | 1072 [493 – 2120]      | 64 [30 – 127]    |
|                 | <b>2.5y</b>  | 130 [62 – 260]                                     | 1084 [517 – 2169]      | 65 [31 – 130]    |
|                 | <b>6.5y</b>  | 142 [67 – 306]                                     | 1184 [561 – 2549]      | 71 [34 – 153]    |
|                 | <b>12.5y</b> | 170 [75 – 331]                                     | 1414 [626 – 2757]      | 85 [38 – 165]    |
| <b>KF = 1</b>   | <b>0.5y</b>  | 88 [43 – 178]                                      | 734 [362 – 1487]       | 44 [22 – 89]     |
|                 | <b>1.5y</b>  | 93 [48 – 183]                                      | 772 [398 – 1521]       | 46 [24 – 91]     |
|                 | <b>2.5y</b>  | 96 [47 – 191]                                      | 803 [395 – 1594]       | 48 [24 – 96]     |
|                 | <b>6.5y</b>  | 106 [54 – 226]                                     | 887 [446 – 1886]       | 53 [27 – 113]    |
|                 | <b>12.5y</b> | 126 [61 – 244]                                     | 1053 [510 -2030]       | 63 [31 – 122]    |
| <b>KF = 1.5</b> | <b>0.5y</b>  | 70 [35 – 142]                                      | 585 [290 – 1180]       | 35 [17 – 71]     |
|                 | <b>1.5y</b>  | 76 [38 – 147]                                      | 630 [315 – 1225]       | 38 [19 – 74]     |
|                 | <b>2.5y</b>  | 77 [36 – 154]                                      | 645 [301 – 1287]       | 39 [18 – 77]     |
|                 | <b>6.5y</b>  | 86 [43 – 180]                                      | 716 [358 – 1498]       | 43 [22 – 90]     |

|                 |              |                                                     |                        |                  |
|-----------------|--------------|-----------------------------------------------------|------------------------|------------------|
|                 | <b>12.5y</b> | 102 [50 – 202]                                      | 850 [420 – 1679]       | 51 [25 – 101]    |
|                 |              | <b>PO High dose (20 mg/kg), total concentration</b> |                        |                  |
|                 |              | <i>P. aeruginosa</i>                                | <i>Enterobacteriae</i> | <i>S. aureus</i> |
| <b>KF = 0.5</b> | <b>0.5y</b>  | 157 [77 – 325]                                      | 1306 [642 – 2712]      | 78 [39 – 163]    |
|                 | <b>1.5y</b>  | 170 [82 – 340]                                      | 1416 [684 – 2837]      | 85 [41 – 170]    |
|                 | <b>2.5y</b>  | 174 [81 – 345]                                      | 1451 [675 – 2872]      | 87 [41 – 172]    |
|                 | <b>6.5y</b>  | 196 [94 – 420]                                      | 1630 [784 – 3503]      | 98 [47 – 210]    |
|                 | <b>12.5y</b> | 240 [109 – 464]                                     | 2004 [906 – 3869]      | 120 [54 – 232]   |
| <b>KF = 1</b>   | <b>0.5y</b>  | 117 [59 – 232]                                      | 971 [488 – 1931]       | 58 [29 – 116]    |
|                 | <b>1.5y</b>  | 125 [63 – 246]                                      | 1043 [523 – 2048]      | 63 [31 – 123]    |
|                 | <b>2.5y</b>  | 128 [63 – 253]                                      | 1070 [527 – 2107]      | 64 [32 – 126]    |
|                 | <b>6.5y</b>  | 147 [73 – 307]                                      | 1225 [610 – 2558]      | 73 [37 – 153]    |
|                 | <b>12.5y</b> | 177 [86 – 345]                                      | 1479 [717 – 2874]      | 89 [43 – 172]    |
| <b>KF = 1.5</b> | <b>0.5y</b>  | 93 [46 – 188]                                       | 775 [385 – 1566]       | 46 [23 – 94]     |
|                 | <b>1.5y</b>  | 100 [49 – 194]                                      | 837 [407 – 1619]       | 50 [24 – 97]     |
|                 | <b>2.5y</b>  | 104 [50 – 202]                                      | 868 [416 – 1687]       | 52 [25 – 101]    |
|                 | <b>6.5y</b>  | 118 [59 – 248]                                      | 983 [488 – 2066]       | 59 [29 – 124]    |
|                 | <b>12.5y</b> | 142 [71 – 278]                                      | 1187 [588 – 2313]      | 71 [35 – 139]    |



| IV Low dose (10 mg/kg), unbound concentration  |              |                      |                           |                  |
|------------------------------------------------|--------------|----------------------|---------------------------|------------------|
|                                                |              | <i>P. aeruginosa</i> | <i>Enterobacteriaceae</i> | <i>S. aureus</i> |
| <b>KF = 0.5</b>                                | <b>0.5y</b>  | 101 [50 – 201]       | 838 [419 – 1677]          | 50 [25 – 101]    |
|                                                | <b>1.5y</b>  | 107 [49 – 206]       | 890 [405 – 1715]          | 53 [24 – 103]    |
|                                                | <b>2.5y</b>  | 104 [51 – 208]       | 867 [422 – 1736]          | 52 [25 – 104]    |
|                                                | <b>6.5y</b>  | 124 [58 – 248]       | 1030 [481 – 2066]         | 62 [29 – 124]    |
|                                                | <b>12.5y</b> | 132 [63 – 281]       | 1097 [523 – 2338]         | 66 [31 – 140]    |
| <b>KF = 1</b>                                  | <b>0.5y</b>  | 75 [40 – 155]        | 628 [335 – 1293]          | 38 [20 – 78]     |
|                                                | <b>1.5y</b>  | 79 [37 – 155]        | 662 [312 – 662]           | 40 [19 – 77]     |
|                                                | <b>2.5y</b>  | 79 [40 – 156]        | 657 [332 – 1301]          | 39 [20 – 78]     |
|                                                | <b>6.5y</b>  | 94 [47 – 181]        | 787 [390 – 1511]          | 47 [23 – 91]     |
|                                                | <b>12.5y</b> | 101 [49 – 203]       | 845 [404 – 1691]          | 51 [24 – 101]    |
| <b>KF = 1.5</b>                                | <b>0.5y</b>  | 62 [32 – 125]        | 514 [267 – 1043]          | 31 [16 – 63]     |
|                                                | <b>1.5y</b>  | 96 [47 – 195]        | 802 [388 – 1626]          | 48 [23 – 98]     |
|                                                | <b>2.5y</b>  | 64 [33 – 129]        | 535 [272 – 1071]          | 32 [16 – 64]     |
|                                                | <b>6.5y</b>  | 77 [39 – 151]        | 639 [325 – 1262]          | 38 [20 – 76]     |
|                                                | <b>12.5y</b> | 83 [40 – 166]        | 692 [334 – 1380]          | 41 [20 – 83]     |
| IV High dose (15 mg/kg), unbound concentration |              |                      |                           |                  |

|                                                      |              | <i>P. aeruginosa</i> | <i>Enterobacteriae</i> | <i>S. aureus</i> |
|------------------------------------------------------|--------------|----------------------|------------------------|------------------|
| <b>KF = 0.5</b>                                      | <b>0.5y</b>  | 150 [76 – 302]       | 1248 [635 – 2513]      | 75 [38 – 151]    |
|                                                      | <b>1.5y</b>  | 159 [73 – 309]       | 1324 [604 – 2576]      | 79 [36 – 155]    |
|                                                      | <b>2.5y</b>  | 157 [77 – 319]       | 1307 [644 – 2657]      | 78 [39 – 159]    |
|                                                      | <b>6.5y</b>  | 191 [88 – 374]       | 1593 [733 – 3117]      | 96 [44 – 187]    |
|                                                      | <b>12.5y</b> | 216 [97 – 448]       | 1799 [808 – 3737]      | 108 [48 – 224]   |
| <b>KF = 1</b>                                        | <b>0.5y</b>  | 113 [59 – 227]       | 942 [494 – 1893]       | 57 [30 – 114]    |
|                                                      | <b>1.5y</b>  | 119 [58 – 235]       | 992 [482 – 1959]       | 60 [29 – 118]    |
|                                                      | <b>2.5y</b>  | 119 [61 – 238]       | 989 [509 – 1980]       | 59 [31 – 119]    |
|                                                      | <b>6.5y</b>  | 145 [72 – 279]       | 1208 [603 – 2327]      | 72 [36 – 140]    |
|                                                      | <b>12.5y</b> | 163 [78 – 324]       | 1355 [654 – 2697]      | 81 [39 – 162]    |
| <b>KF = 1.5</b>                                      | <b>0.5y</b>  | 91 [48 – 189]        | 762 [402 – 1579]       | 46 [24 – 95]     |
|                                                      | <b>1.5y</b>  | 64 [31 – 133]        | 534 [258 – 1111]       | 32 [16 – 67]     |
|                                                      | <b>2.5y</b>  | 97 [50 – 197]        | 811 [417 – 1638]       | 49 [25 – 98]     |
|                                                      | <b>6.5y</b>  | 118 [59 – 230]       | 983 [492 – 1916]       | 59 [30 – 115]    |
|                                                      | <b>12.5y</b> | 135 [65 – 283]       | 1121 [542 – 2357]      | 67 [33 – 141]    |
| <b>PO Low dose (15 mg/kg), unbound concentration</b> |              |                      |                        |                  |

|                                                       |              | <i>P. aeruginosa</i> | <i>Enterobacteriae</i> | <i>S. aureus</i> |
|-------------------------------------------------------|--------------|----------------------|------------------------|------------------|
| <b>KF = 0.5</b>                                       | <b>0.5y</b>  | 78 [36 – 159]        | 649 [304 – 1322]       | 39 [18 – 79]     |
|                                                       | <b>1.5y</b>  | 85 [39 – 178]        | 705 [324 – 1481]       | 42 [19 – 89]     |
|                                                       | <b>2.5y</b>  | 87 [39 – 175]        | 722 [326 – 1458]       | 43 [20 – 87]     |
|                                                       | <b>6.5y</b>  | 95 [45 – 191]        | 794 [374 – 1592]       | 48 [22 – 95]     |
|                                                       | <b>12.5y</b> | 108 [50 – 213]       | 899 [419 – 1775]       | 54 [25 – 107]    |
| <b>KF = 1</b>                                         | <b>0.5y</b>  | 58 [29 – 111]        | 486 [238 – 929]        | 29 [14 – 56]     |
|                                                       | <b>1.5y</b>  | 62 [30 – 129]        | 517 [247 – 1075]       | 31 [15 – 64]     |
|                                                       | <b>2.5y</b>  | 65 [32 – 129]        | 544 [264 – 1072]       | 33 [16 – 64]     |
|                                                       | <b>6.5y</b>  | 71 [36 – 136]        | 592 [297 – 1130]       | 35 [18 – 68]     |
|                                                       | <b>12.5y</b> | 82 [40 – 157]        | 682 [335 – 1307]       | 41 [20 – 78]     |
| <b>KF = 1.5</b>                                       | <b>0.5y</b>  | 47 [22 – 89]         | 389 [182 – 739]        | 23 [11 – 44]     |
|                                                       | <b>1.5y</b>  | 50 [25 – 103]        | 415 [205 – 856]        | 25 [12 – 51]     |
|                                                       | <b>2.5y</b>  | 53 [25 – 102]        | 444 [210 – 853]        | 27 [13 – 51]     |
|                                                       | <b>6.5y</b>  | 57 [28 – 110]        | 476 [235 – 915]        | 29 [14 – 55]     |
|                                                       | <b>12.5y</b> | 66 [33 – 127]        | 549 [276 – 1056]       | 33 [17 – 63]     |
| <b>PO High dose (20 mg/kg), unbound concentration</b> |              |                      |                        |                  |



|                 |              | <i>P. aeruginosa</i> | <i>Enterobacteriae</i> | <i>S. aureus</i> |
|-----------------|--------------|----------------------|------------------------|------------------|
| <b>KF = 0.5</b> | <b>0.5y</b>  | 104 [48 – 207]       | 866 [402 – 1728]       | 52 [24 – 104]    |
|                 | <b>1.5y</b>  | 112 [53 – 231]       | 937 [444 – 1928]       | 56 [27 – 116]    |
|                 | <b>2.5y</b>  | 117 [52 – 233]       | 978 [435 – 1940]       | 59 [26 – 116]    |
|                 | <b>6.5y</b>  | 130 [63 – 256]       | 1080 [529 – 2129]      | 65 [32 – 128]    |
|                 | <b>12.5y</b> | 154 [72 – 312]       | 1284 [603 – 2597]      | 77 [36 – 156]    |
| <b>KF = 1</b>   | <b>0.5y</b>  | 77 [38 – 149]        | 645 [317 – 1238]       | 39 [19 – 74]     |
|                 | <b>1.5y</b>  | 83 [40 – 171]        | 691 [332 – 1426]       | 41 [20 – 86]     |
|                 | <b>2.5y</b>  | 88 [41 – 171]        | 733 [340 – 1425]       | 44 [20 – 86]     |
|                 | <b>6.5y</b>  | 97 [50 – 187]        | 805 [414 – 1561]       | 48 [25 – 94]     |
|                 | <b>12.5y</b> | 116 [58 – 223]       | 970 [487 – 1860]       | 58 [29 – 112]    |
| <b>KF = 1.5</b> | <b>0.5y</b>  | 62 [30 – 119]        | 515 [250 – 994]        | 31 [15 – 60]     |
|                 | <b>1.5y</b>  | 66 [33 – 139]        | 552 [272 – 1161]       | 33 [16 – 70]     |
|                 | <b>2.5y</b>  | 71 [33 – 137]        | 592 [277 – 1141]       | 36 [17 – 68]     |
|                 | <b>6.5y</b>  | 77 [39 – 150]        | 641 [325 – 1253]       | 38 [20 – 75]     |
|                 | <b>12.5y</b> | 94 [47 – 180]        | 786 [395 – 1498]       | 47 [24 – 90]     |
